# Supplementary material
Source: Springer Nature journal article supplement (https://www.springermedizin.de/resource/supplementary/12955_2009_649_MOESM1_ESM.pdf/9560990)
Supplement: MOESM1 [file 9560990]

a. Identification of Population  
Literature search for existing instruments and definition of population as general population

b. Item generation and selection  
Results of literature search on items considered and interview of 24 participants for item generation and selection

c. Item reduction and d. presentation  
Recruitment of 81 participants for item reduction  
Final third of participants also responded to

e. Pretesting of instrument  
Recruitment of 12 participants for pretesting

f. Validation of questionnaire  
3 populations

2576 participants from temporary food shops

128 participants on the internet, also completed SF-36

20 participants for reliability testing, completed instrument twice, 4 weeks apart
